# Supplementary material
Source: publisher figshare collection journal article supplement (https://geolsoc.figshare.com/ndownloader/files/4847854)
Supplement: Supplementary file 1 [file 4847854]

Table 4. *Isotopes results*

| SAMPLING POINT | δ18O ‰ | δ2H ‰ |
| --- | --- | --- |
| 1 | -6,08 | -37,88 |
| 3 | -6,67 | -40,87 |
| 4 | -6,59 | -39,50 |
| 5 | -6,38 | -38,79 |
| 6 | -6,56 | -39,43 |
| 7 | -6,62 | -40,01 |
| 8 | -6,66 | -40,13 |
| 9 | -6,46 | -39,05 |
| 10 | -6,41 | -37,98 |
| 11 | -6,16 | -36,70 |
| 12 | -6,21 | -40,50 |
| 13 | -6,43 | -39,57 |
| 14 | -6,06 | -38,18 |
| 15 | -6,70 | -39,93 |
| 16 | -6,20 | -39,03 |
